# Supplementary material for: Synthesis and circularly polarized luminescence properties of BINOL-derived bisbenzofuro[2,3-b:3’,2’-e]pyridines (BBZFPys)
Source: publisher site journal article supplement (doi:10.3762/bjoc.16.32), 2020-03-06
Supplement: Additional file 1 [file 1860-5397-16-32-S1.pdf]

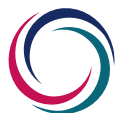

## Supporting Information

for

### **Synthesis and circularly polarized luminescence properties of BINOL-derived bisbenzofuro[2,3-*b*:3',2'-*e*]pyridines (BBZFPys)**

Ryo Takishima, Yuji Nishii, Tomoaki Hinoue, Yoshitane Imai and Masahiro Miura

*Beilstein J. Org. Chem.* **2020**, *16*, 325–336. doi:10.3762/bjoc.16.32

### **Summary of X-ray crystallography data, copy of NMR spectra, and copy of HPLC charts**

## Contents

|                                                                                |     |
|--------------------------------------------------------------------------------|-----|
| 1. Summary of X-ray crystallography data.....                                  | S2  |
| 2. Excitation spectra and fluorescence lifetime measurement of <b>4b</b> ..... | S4  |
| 3. Copies of NMR spectra.....                                                  | S5  |
| 4. Copies of HPLC charts .....                                                 | S15 |
| 5. References.....                                                             | S24 |

## 1. Summary of X-ray crystallography data

The structures were refined on  $F^2$  by full-matrix least-squares method, using SHELXL-2016/6.<sup>1</sup> Hydrogen atoms were included in the refinement on calculated positions riding on their carrier atoms. ORTEP-3<sup>2</sup> programs were used to draw the molecules. The CCDC numbers are 1971471 for (*R*)-**4b** and 1971470 for (*R*)-**4c**.

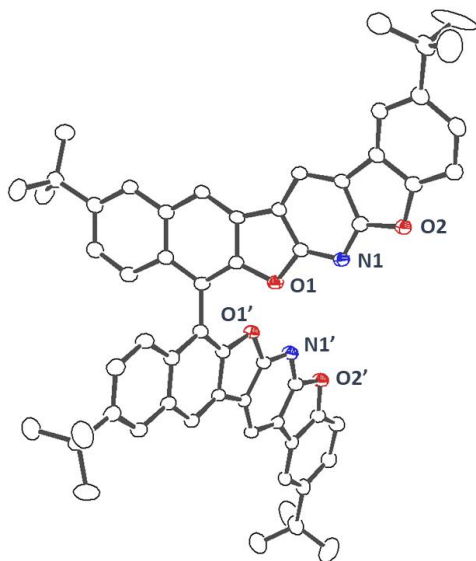

**Figure S1.** ORTEP drawing for **4b** with 50% thermal ellipsoid. Hydrogen atoms and solvent molecules are omitted for clarity.

**Table S1.** Crystal data for **4b**

|                                  |                                                              |
|----------------------------------|--------------------------------------------------------------|
| Crystal system                   | tetragonal                                                   |
| Space group                      | $P4_322$ (No. 95)                                            |
| Unit cell parameter [Å, deg]     | $a = 13.66760(10)$<br>$b = 13.66760(10)$<br>$c = 27.1246(3)$ |
| $Z$                              | 8                                                            |
| R factor ( $I > 2.0\sigma(I)$ )  | $R1 = 0.0746$ , $wR2 = 0.2137$                               |
| R factor (all data)              | $R1 = 0.0777$ , $wR2 = 0.2192$                               |
| Goodness of fit                  | 1.042                                                        |
| The number of unique reflections | 4820 ( $R_{int} = 0.0567$ )                                  |
| Flack parameter                  | 0.07(9)                                                      |

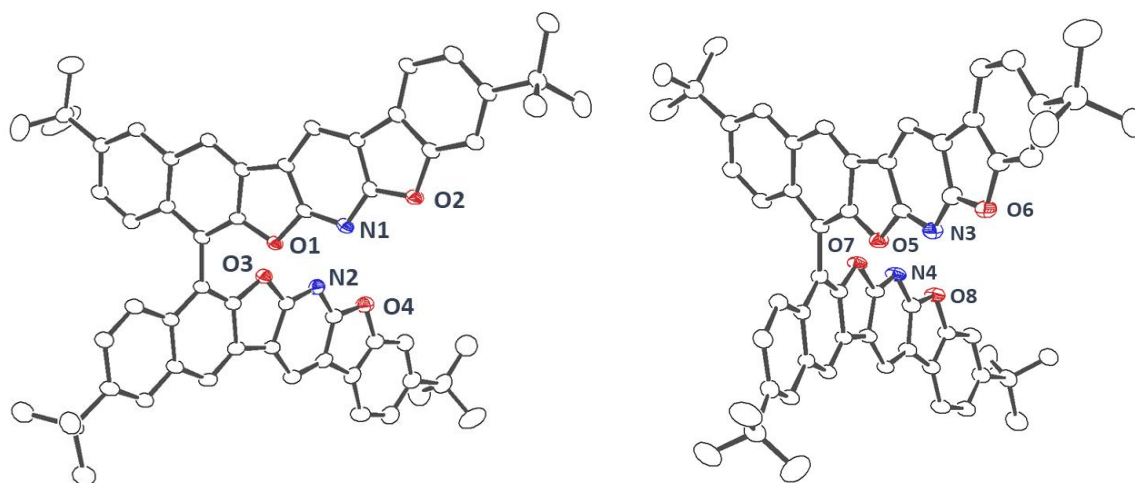

**Figure S2.** ORTEP drawings for **4c** with 50% thermal ellipsoid. Hydrogen atoms and solvent molecules are omitted for clarity.

**Table S2.** Crystal data for **4c**

|                                           |                                                                                  |
|-------------------------------------------|----------------------------------------------------------------------------------|
| Crystal system                            | monoclinic                                                                       |
| Space group                               | $P2_1$ (No. 4)                                                                   |
| Unit cell parameter [ $\text{\AA}$ , deg] | $a = 12.9749(2)$<br>$b = 31.4284(4)$ , $\beta = 99.6540(10)$<br>$c = 14.5186(2)$ |
| $Z$                                       | 2                                                                                |
| R factor ( $I > 2.0\sigma(I)$ )           | $R1 = 0.0607$ , $wR2 = 0.1774$                                                   |
| R factor (all data)                       | $R1 = 0.0655$ , $wR2 = 0.1845$                                                   |
| Goodness of fit                           | 1.080                                                                            |
| The number of unique reflections          | 20761 ( $R_{\text{int}} = 0.0808$ )                                              |
| Flack parameter                           | 0.180(15)                                                                        |

## 2. Excitation spectra and fluorescence lifetime measurement of **4b**

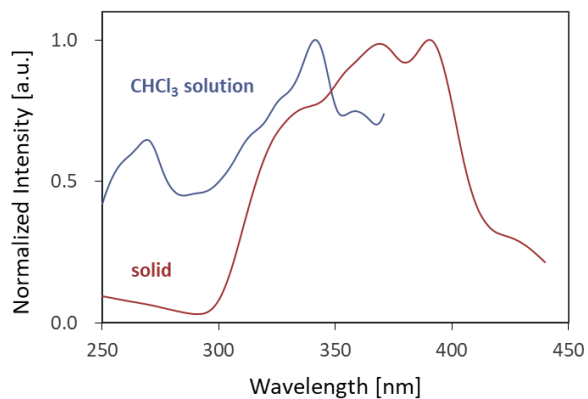

**Figure S3.** Excitation spectra of **4b** measured as diluted ( $1.0 \times 10^{-5}$  M)  $\text{CHCl}_3$  solution (blue,  $\lambda_{\text{flu}}$  391 nm) and in the solid state (red,  $\lambda_{\text{flu}}$  488 nm).

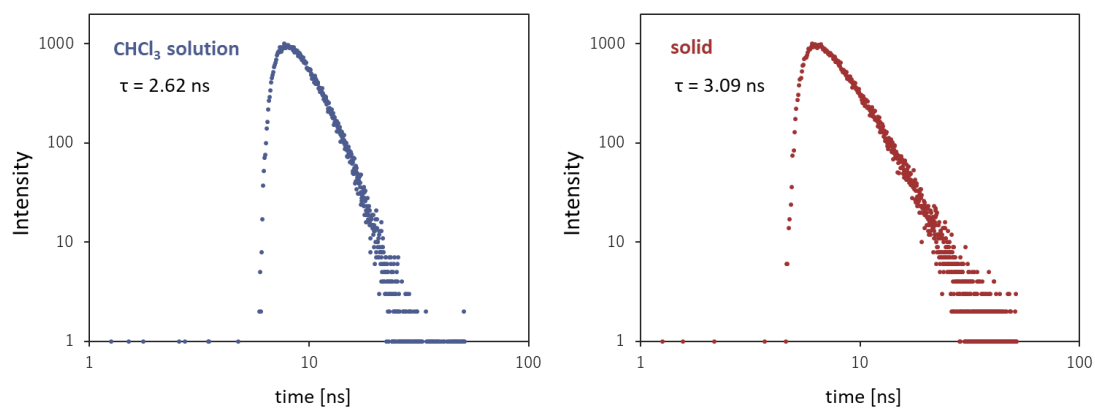

**Figure S4.** Fluorescence life time measurement of **4b** as diluted ( $1.0 \times 10^{-5}$  M)  $\text{CHCl}_3$  solution (blue, left,  $\lambda_{\text{flu}}$  391 nm) and in the solid state (red, right,  $\lambda_{\text{flu}}$  488 nm).

### 3. Copies of NMR spectra

[ $^1\text{H}$ ,  $^{13}\text{C}$ , and  $^{19}\text{F}$  NMR Spectra of **2**]

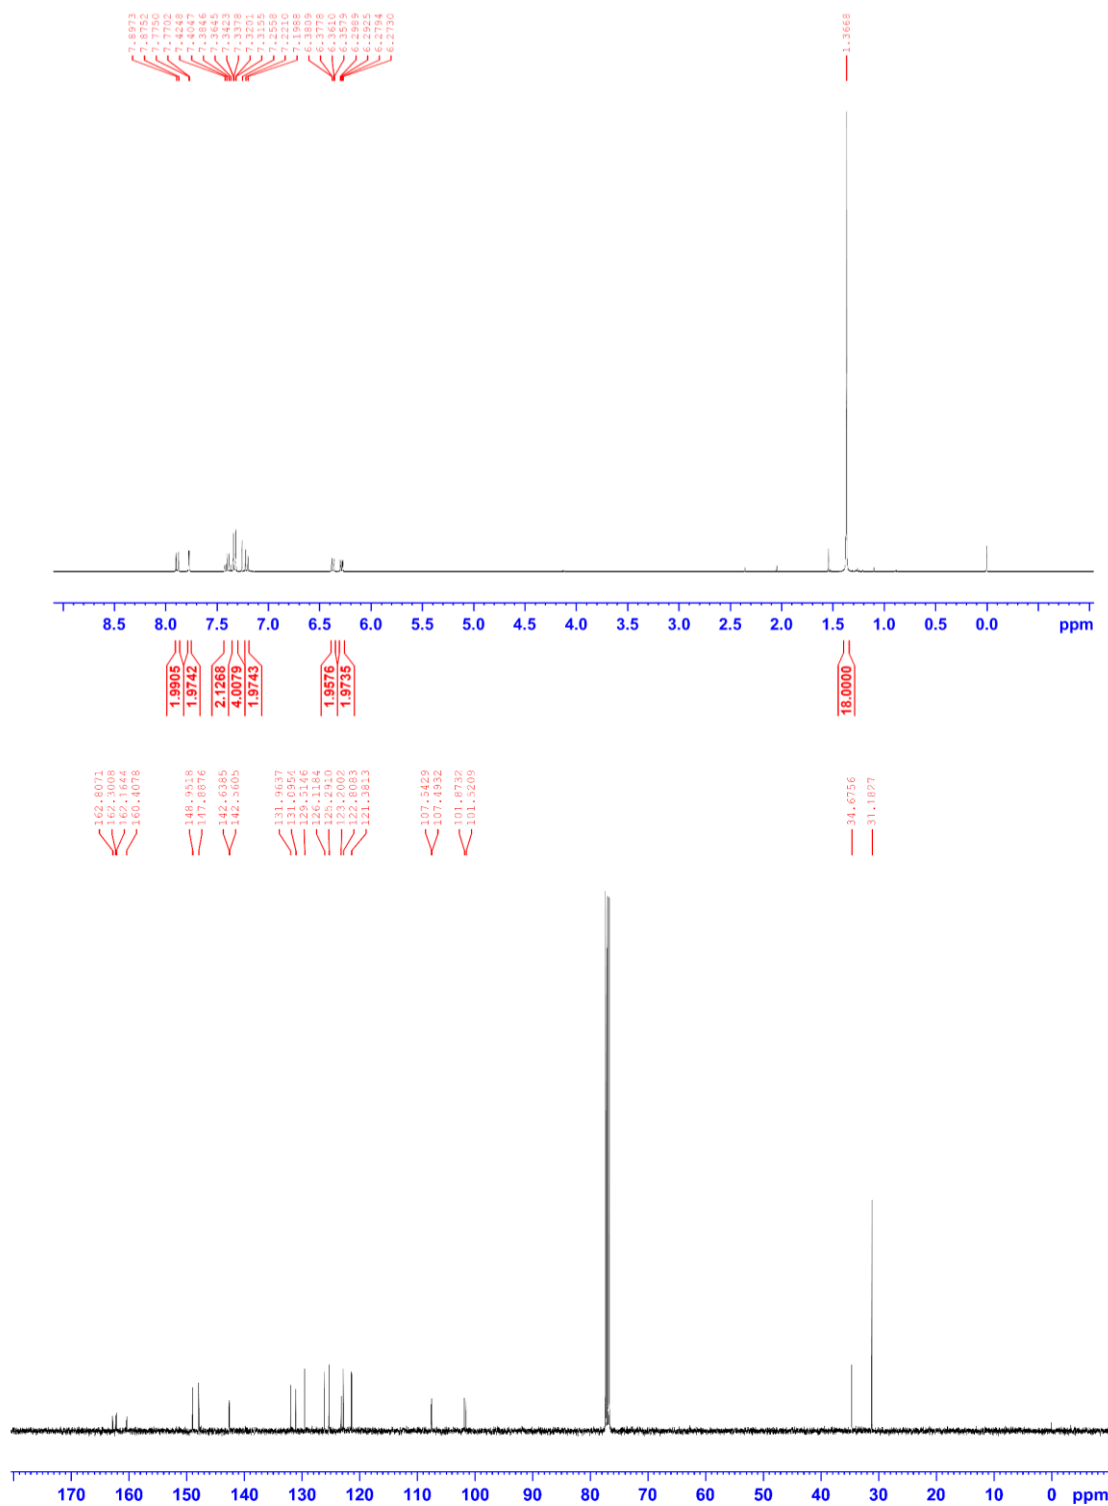

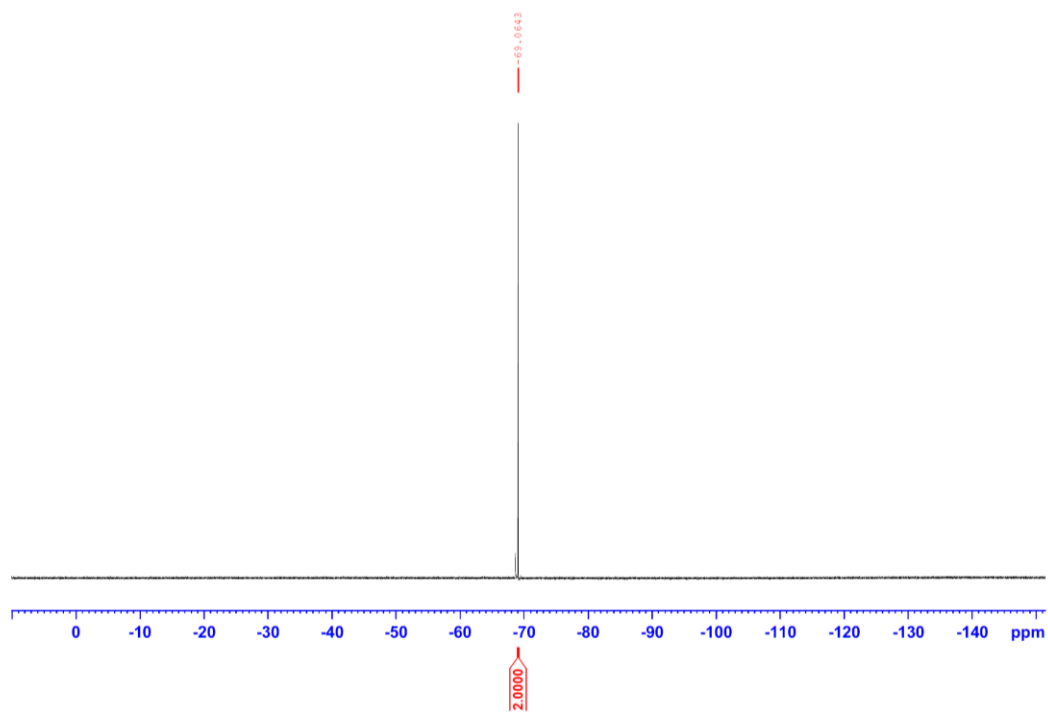

### [<sup>1</sup>H and <sup>13</sup>C NMR Spectra of **3a**]

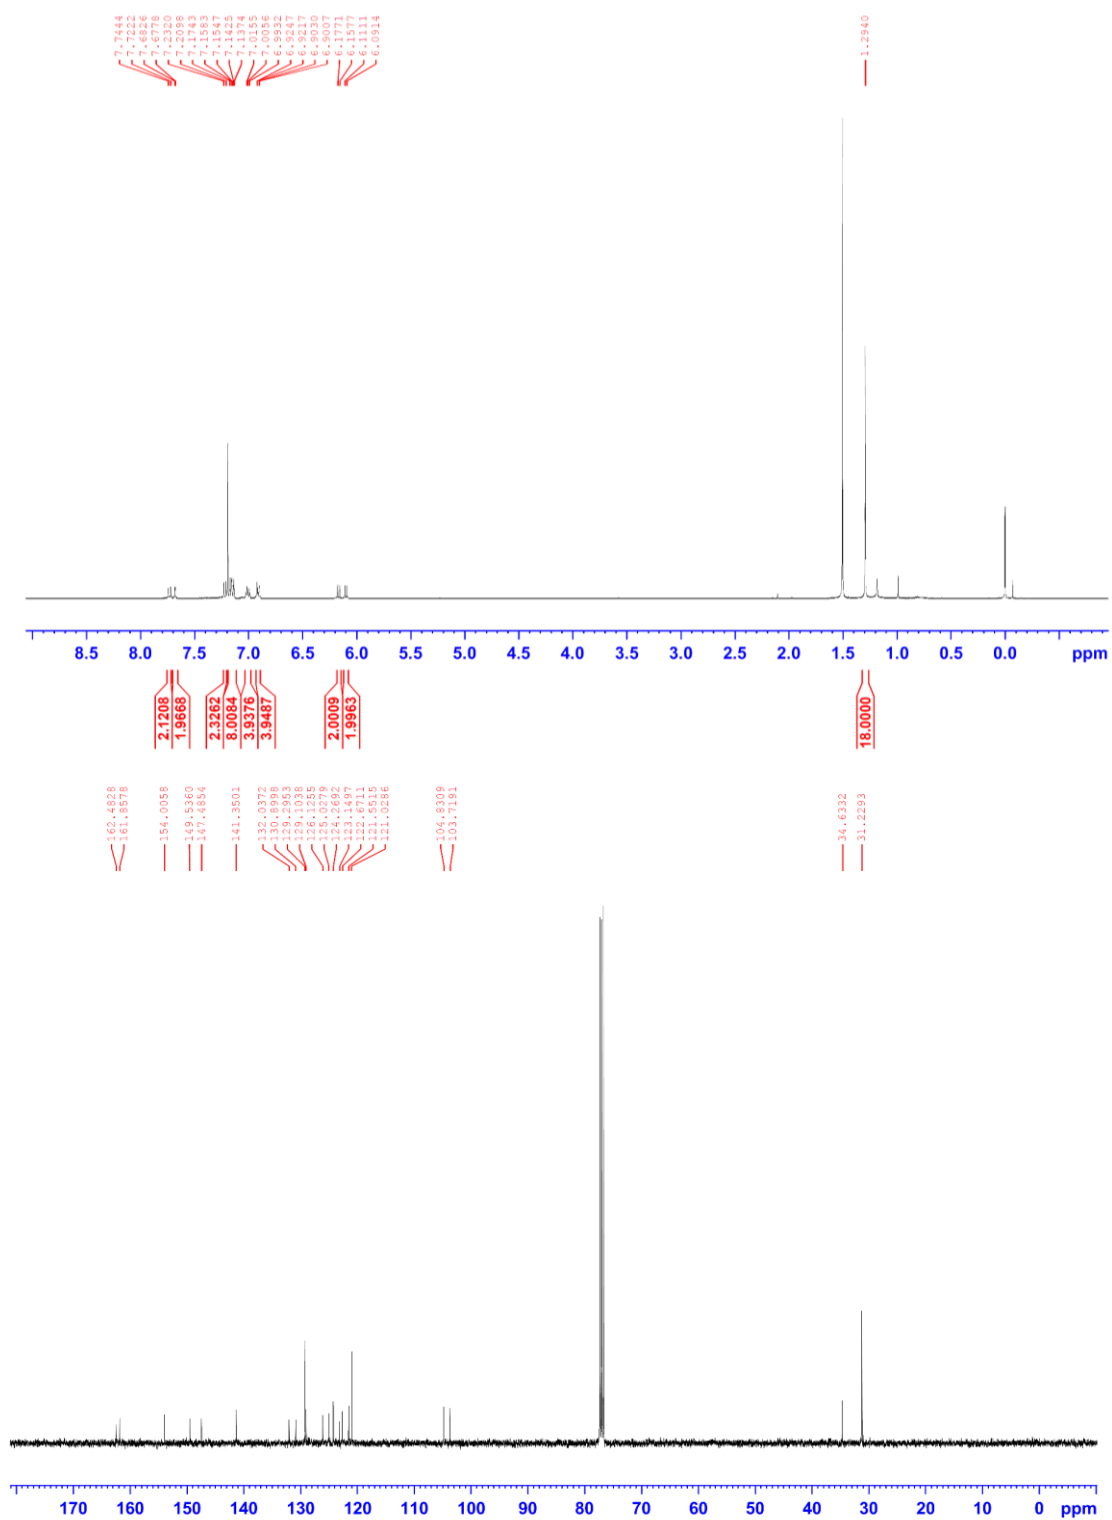



[<sup>1</sup>H and <sup>13</sup>C NMR Spectra of **3b**]

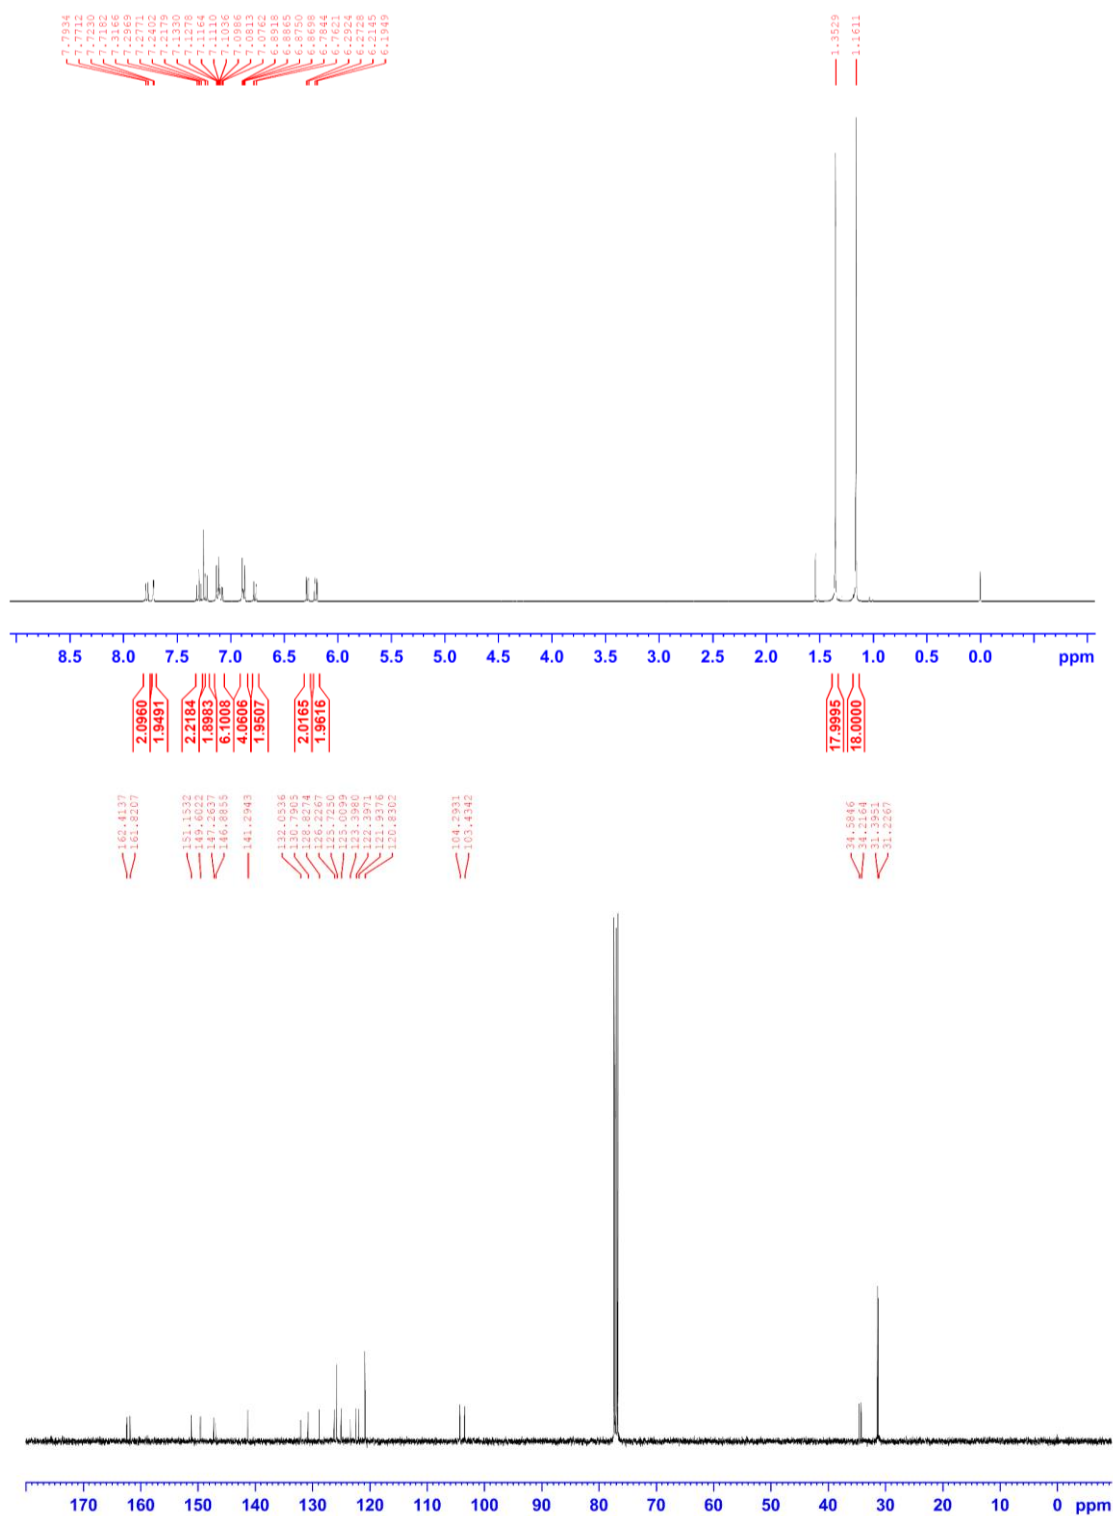

### [<sup>1</sup>H and <sup>13</sup>C NMR Spectra of **3c**]

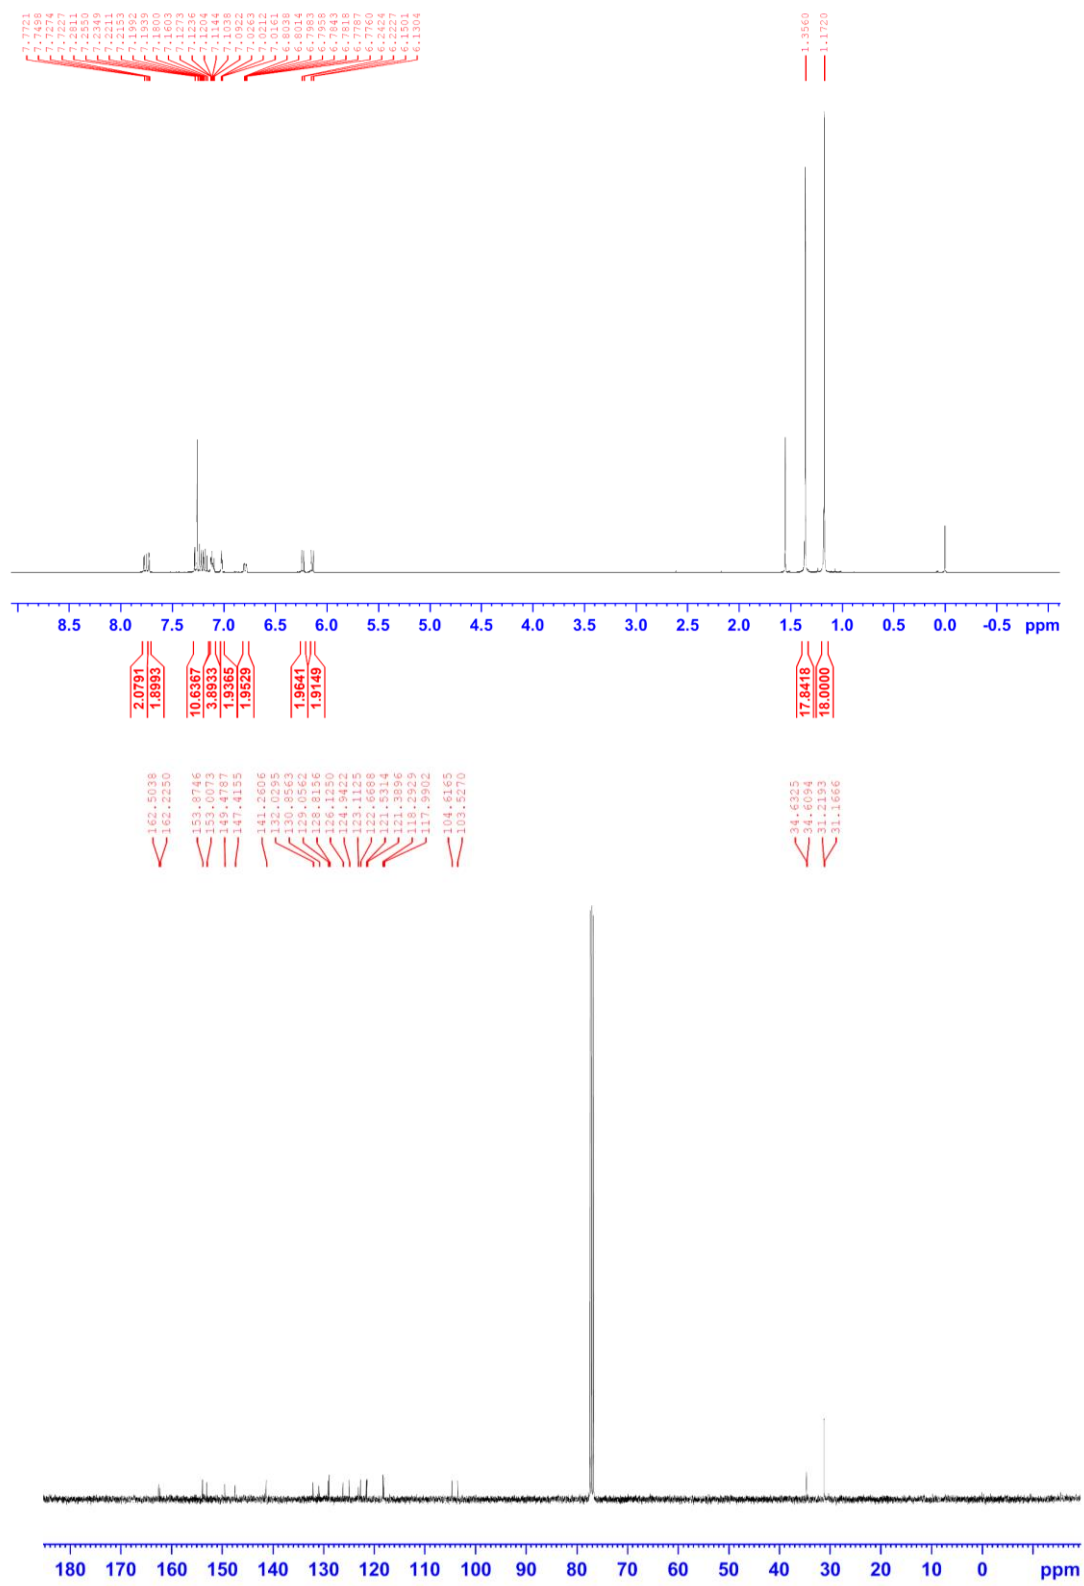

### [<sup>1</sup>H and <sup>13</sup>C NMR Spectra of **4a**]

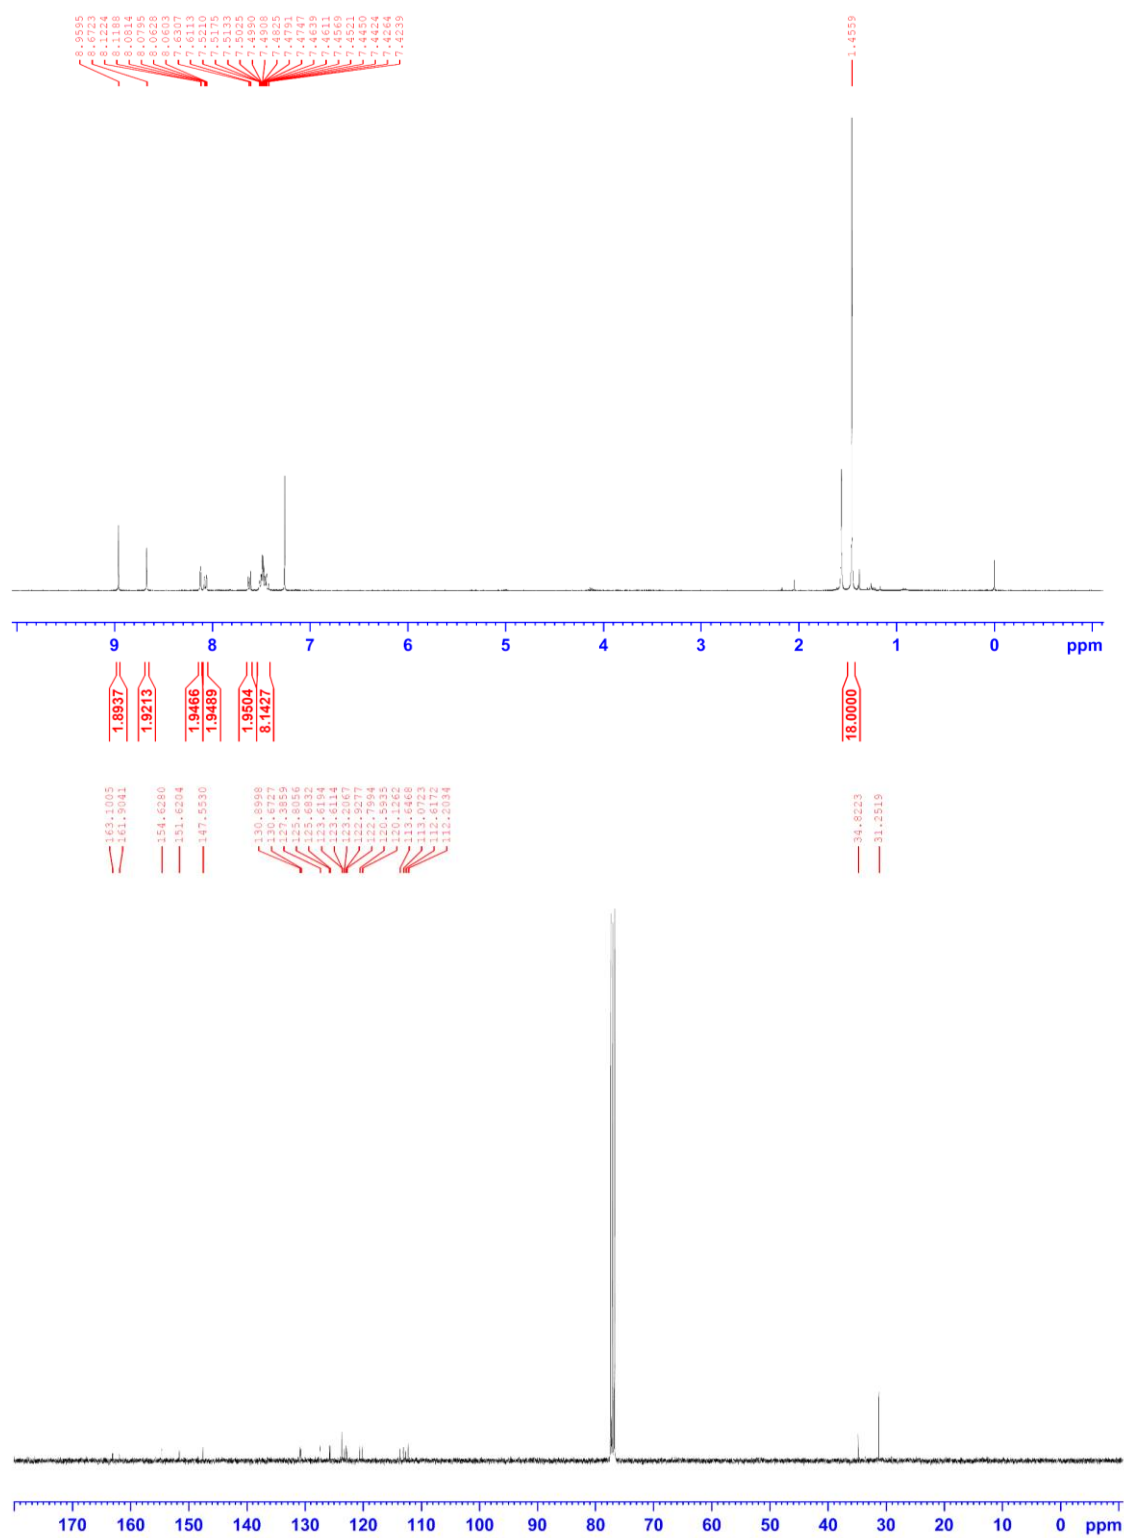

### [<sup>1</sup>H and <sup>13</sup>C NMR Spectra of **4b**]

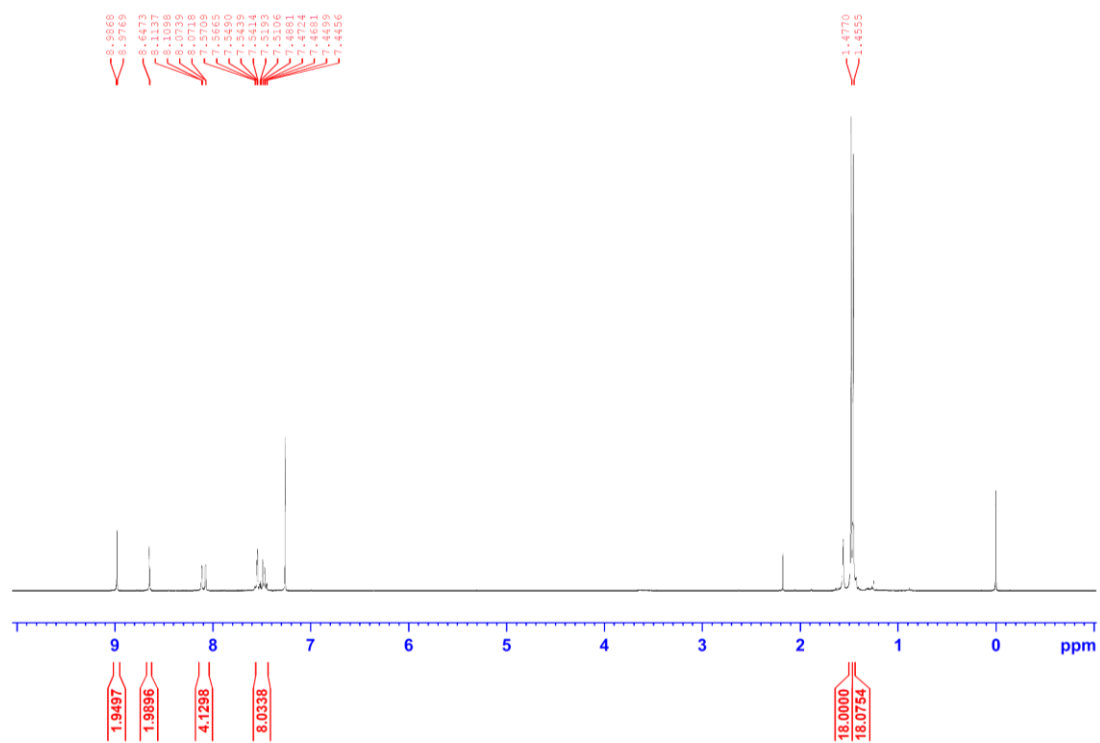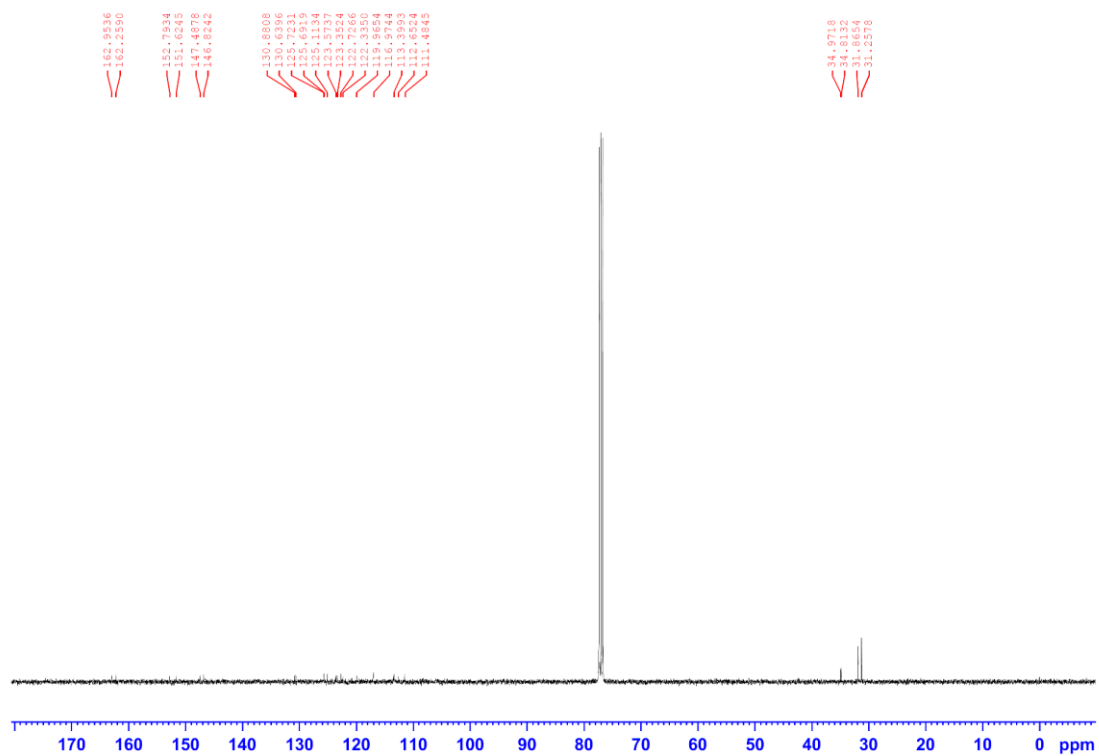

[<sup>1</sup>H and <sup>13</sup>C NMR Spectra of **4c**]

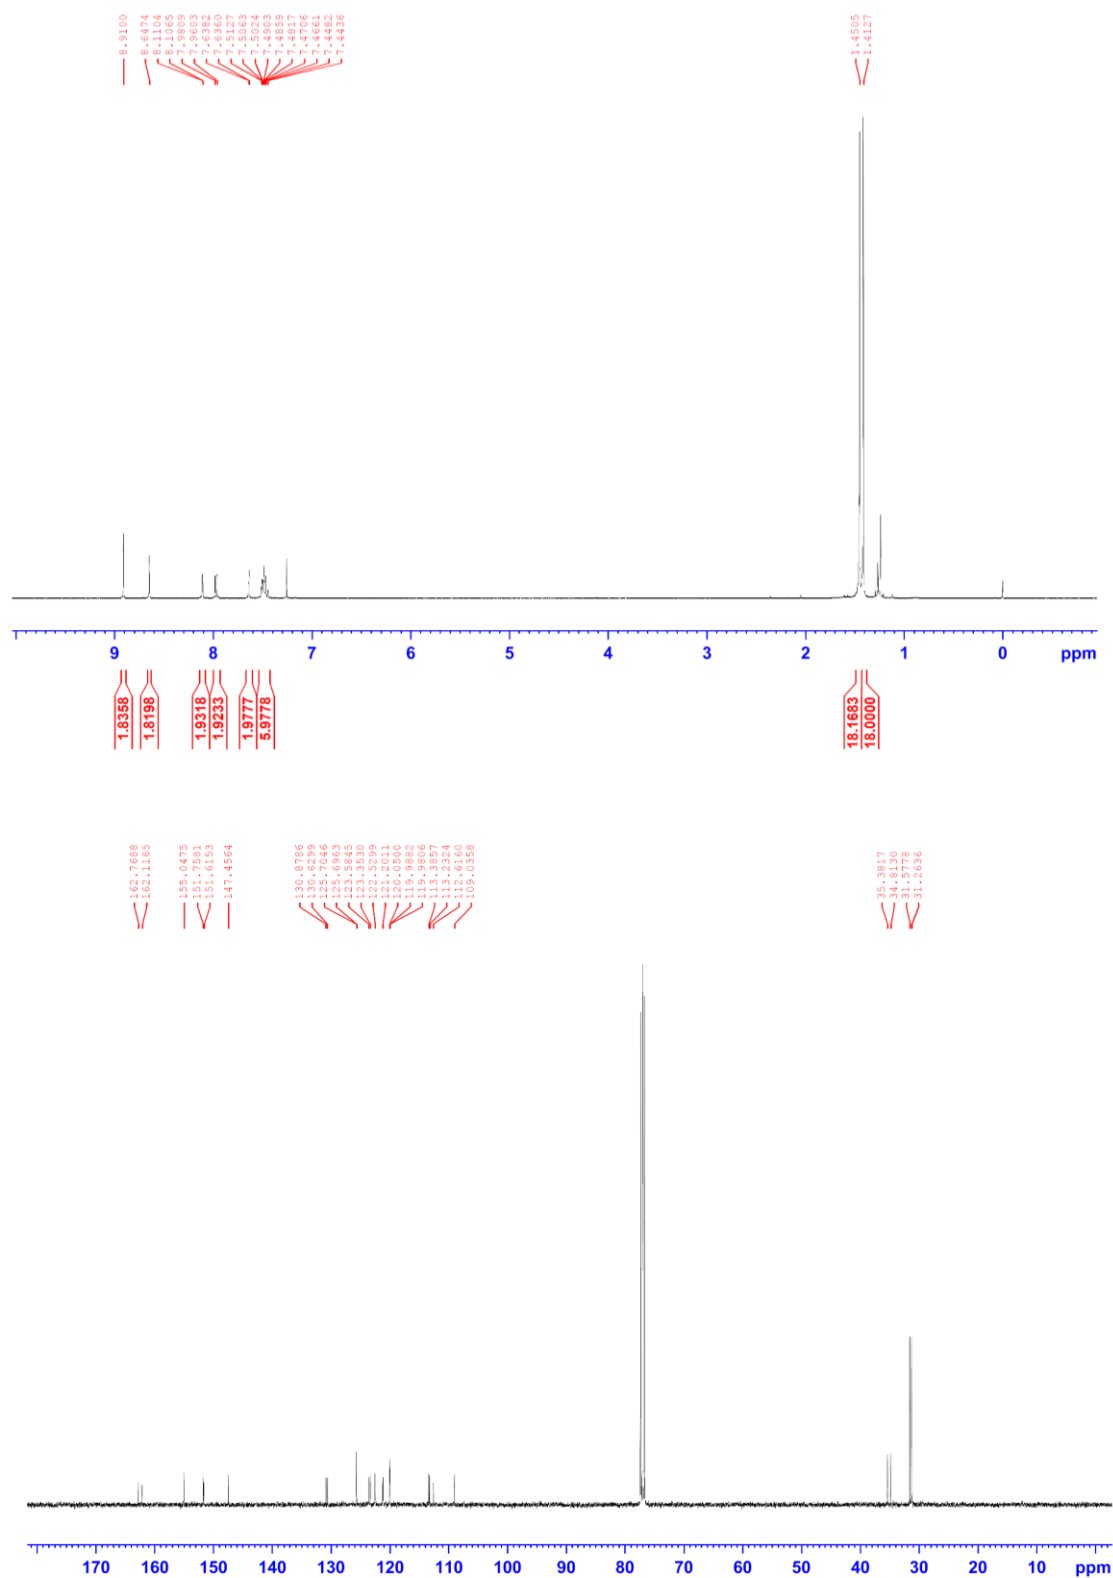

[ $^1\text{H}$  and  $^{13}\text{C}$  NMR Spectra of **5**]

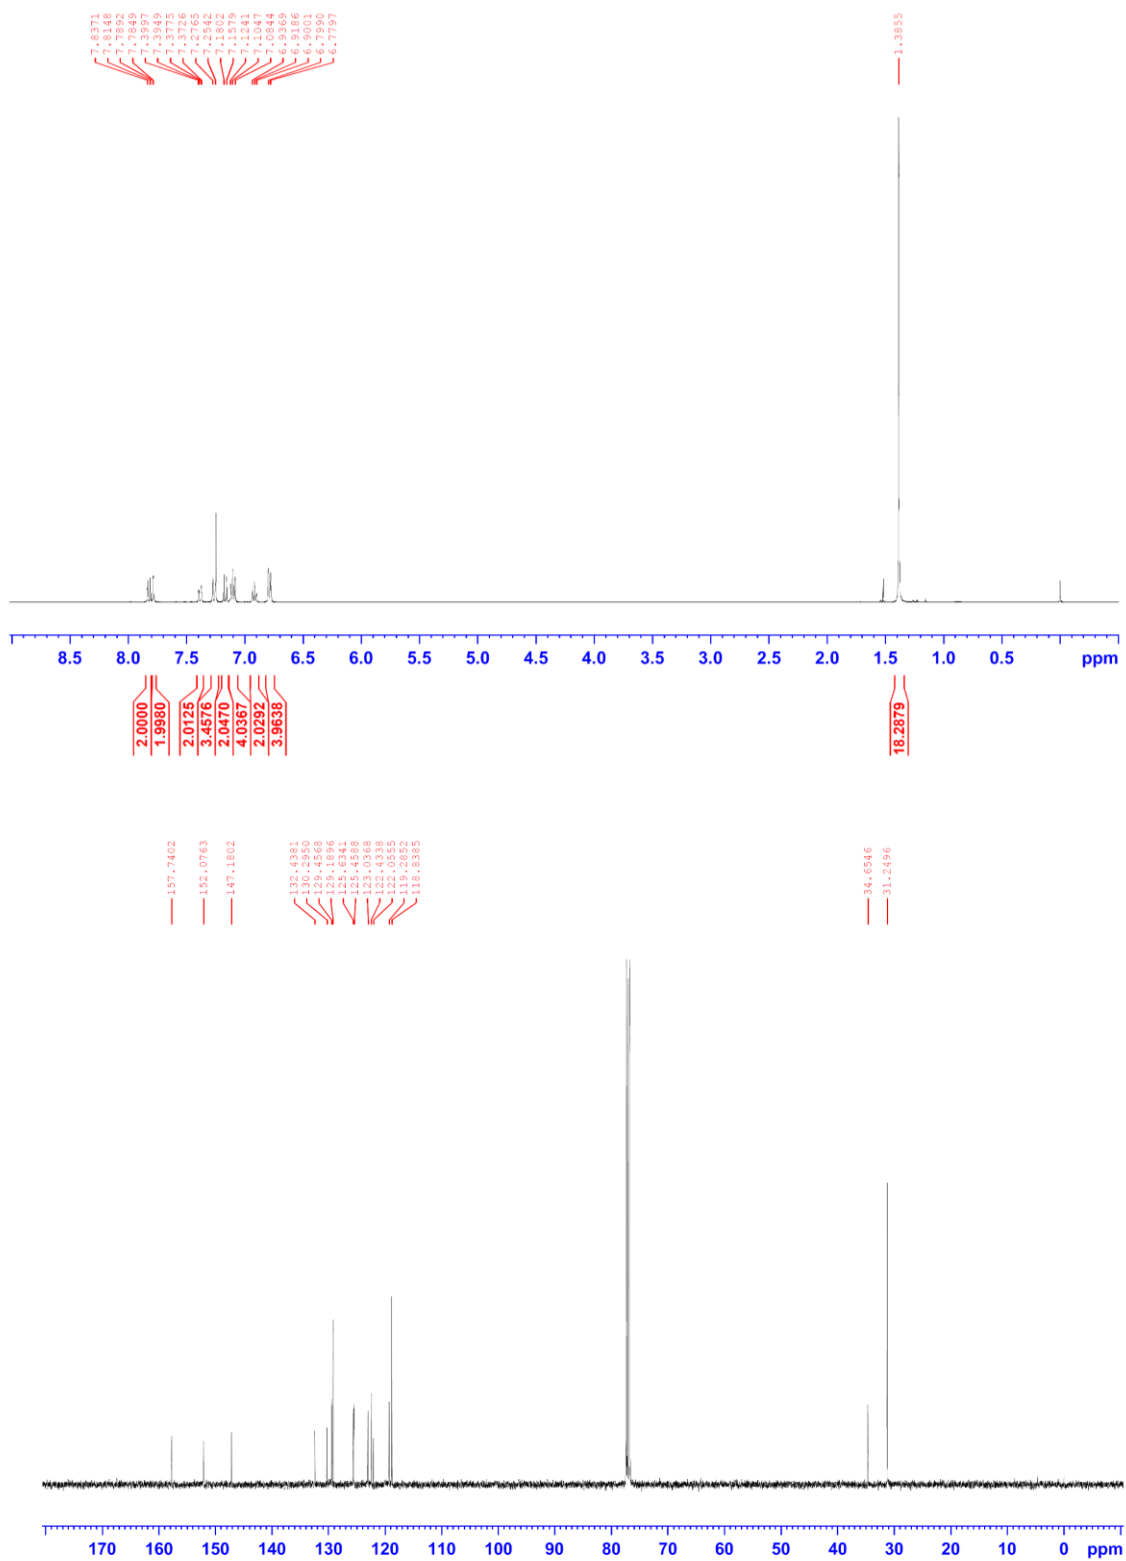

### [<sup>1</sup>H and <sup>13</sup>C NMR Spectra of **6**]

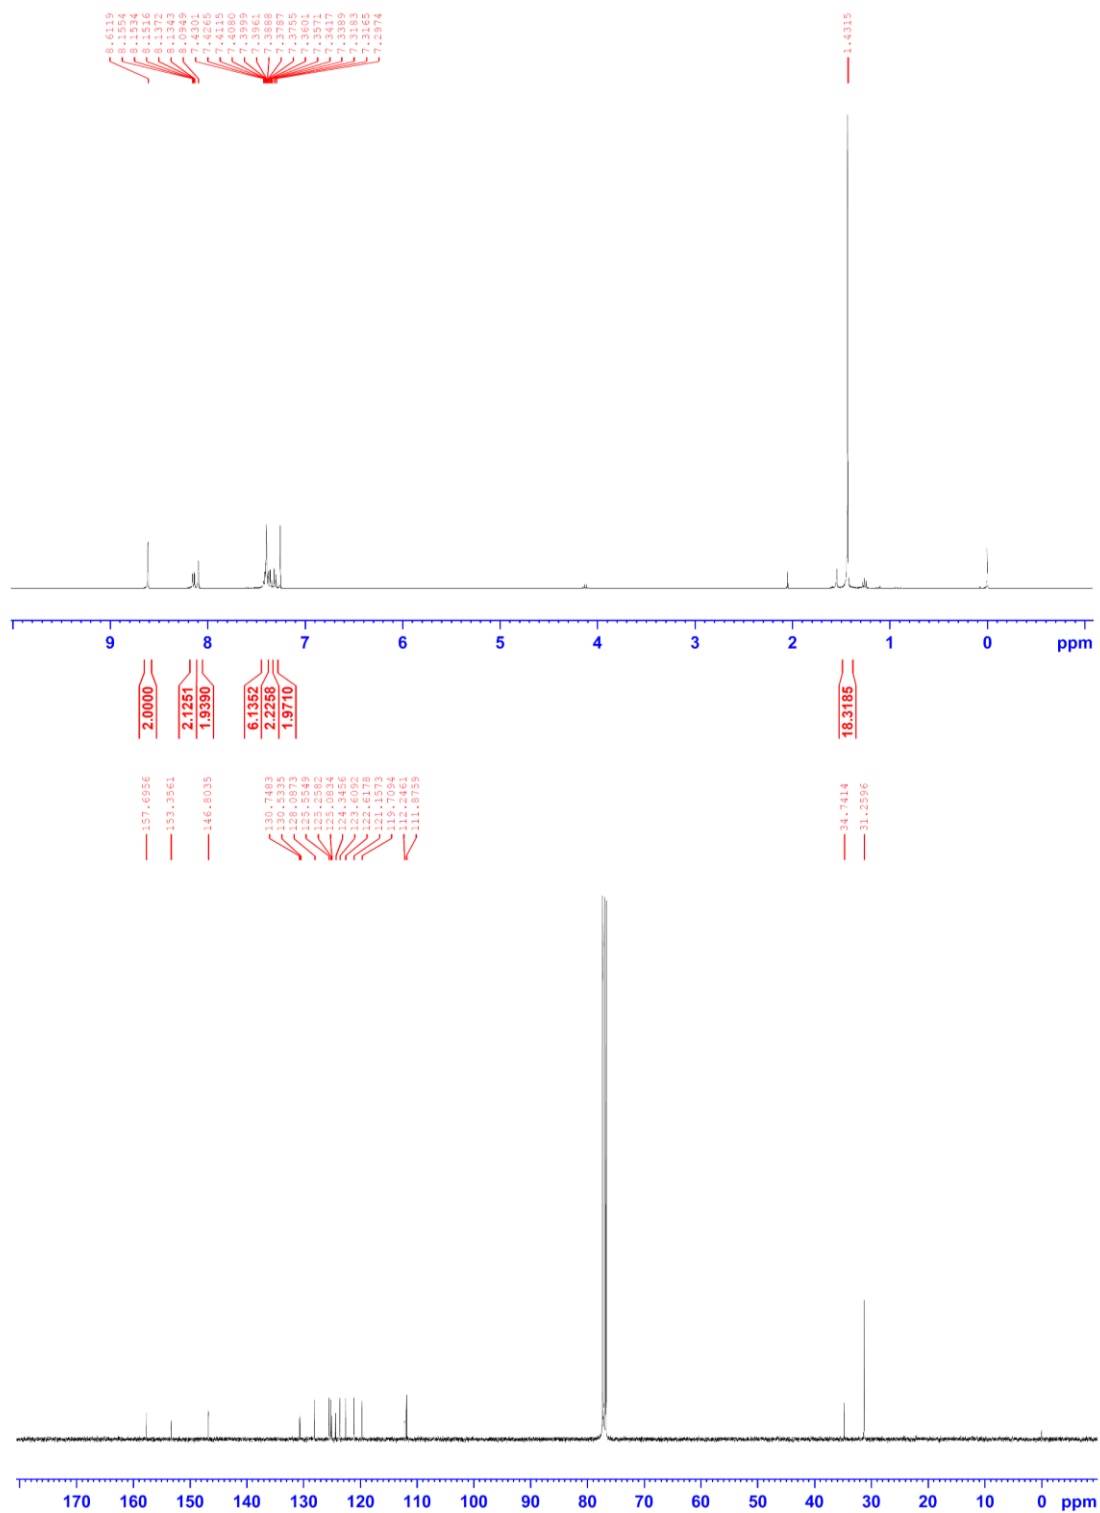

#### 4. Copies of HPLC charts

[(*S*)-2 and (*R*)-2]

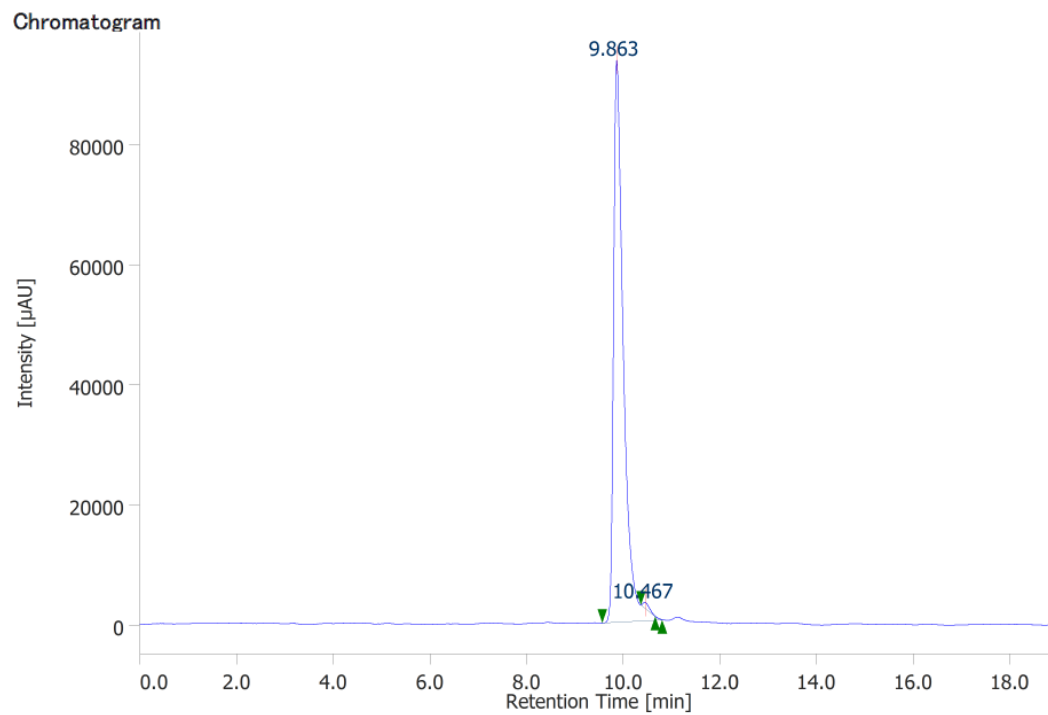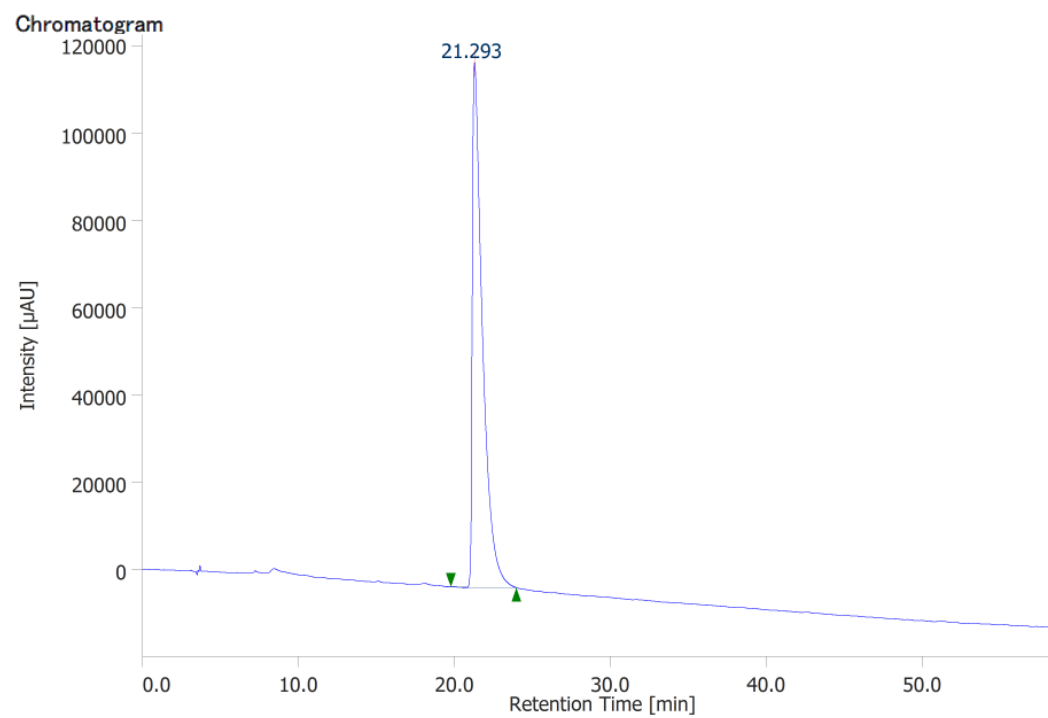



[(*S*)-**3a** and (*R*)-**3a**]

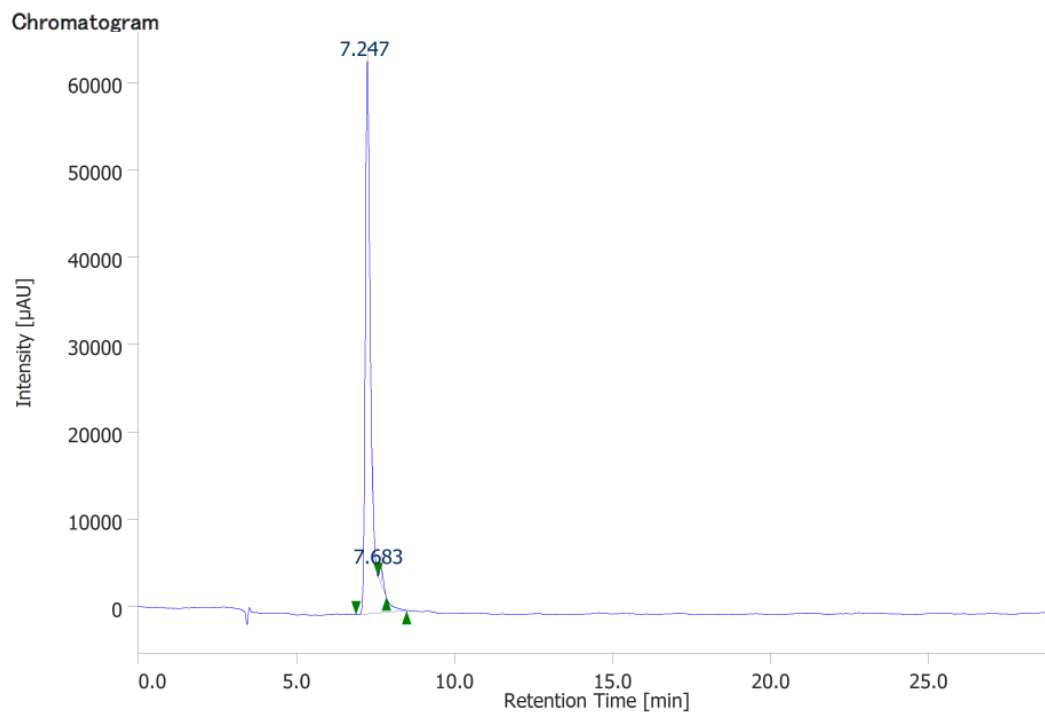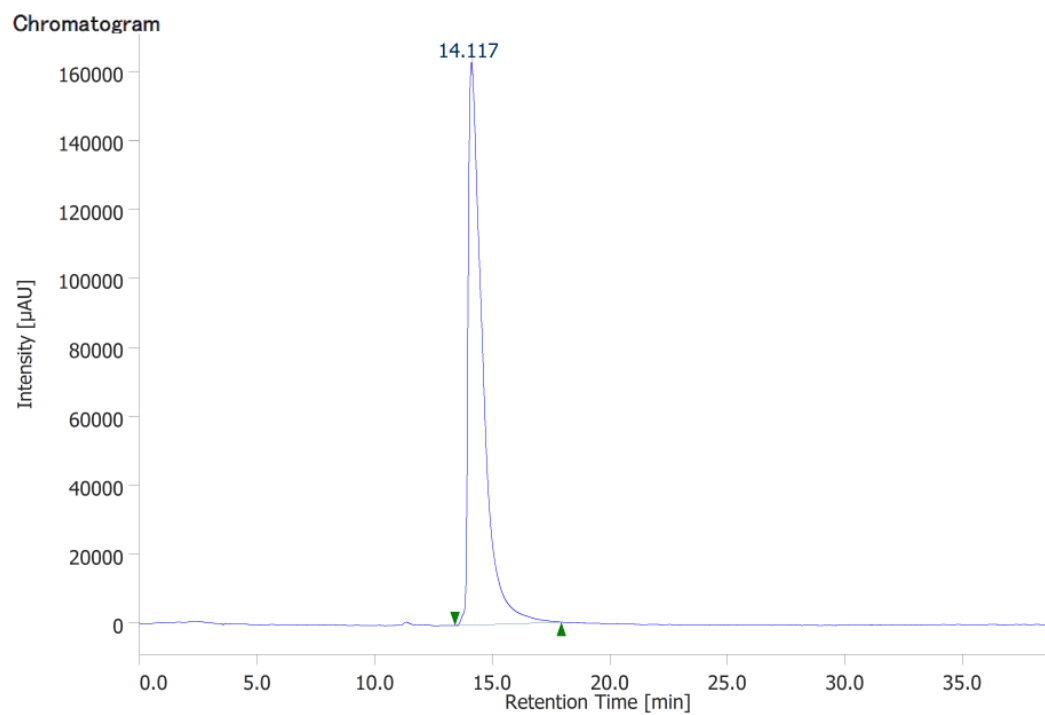

[(*S*)-**3b** and (*R*)-**3b**]

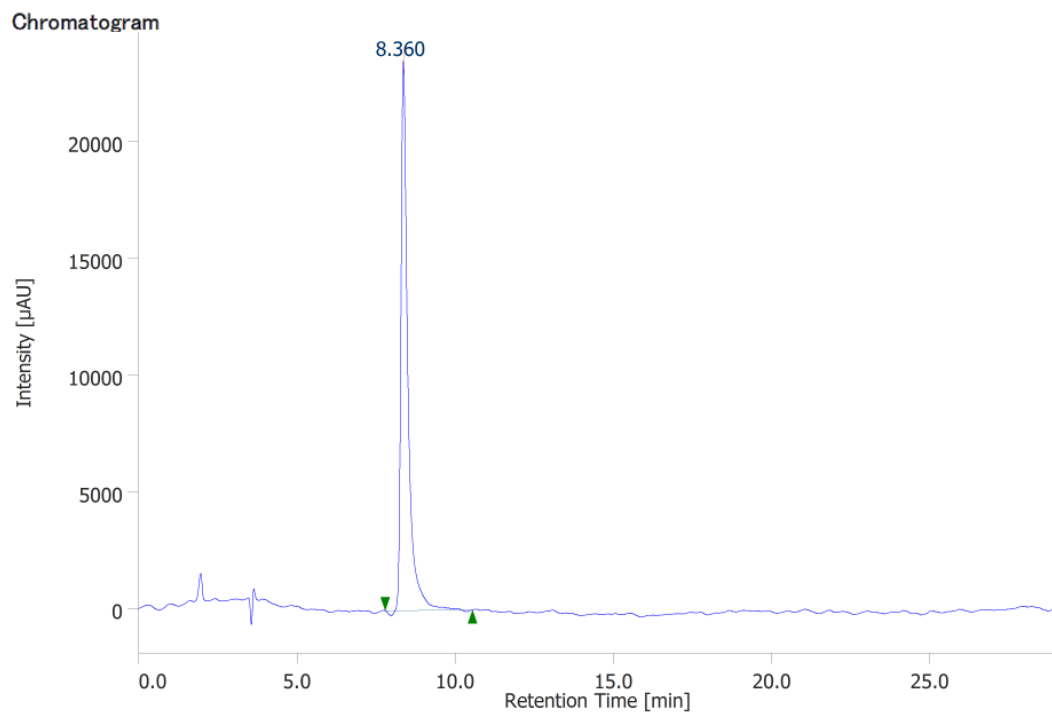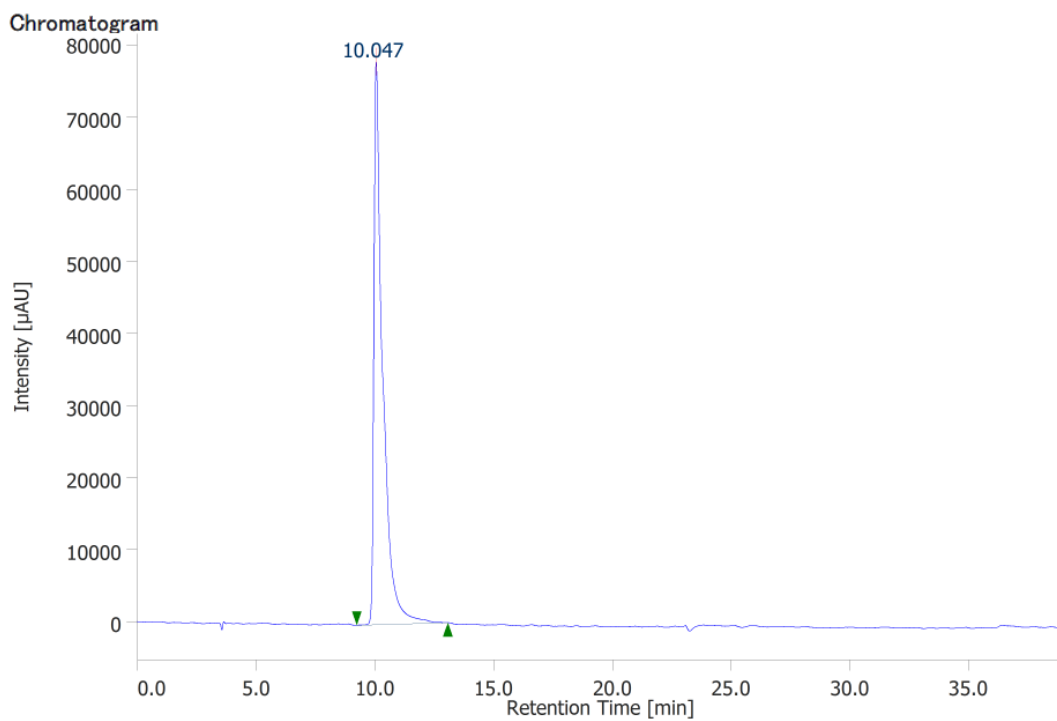

[(*S*)-**3c** and (*R*)-**3c**]

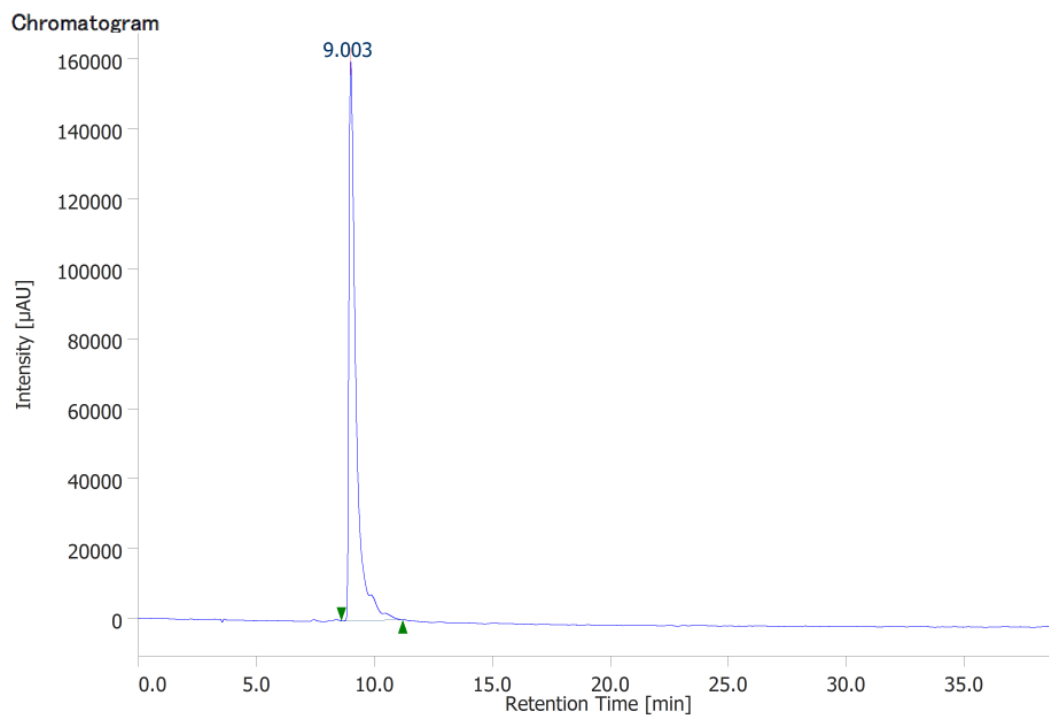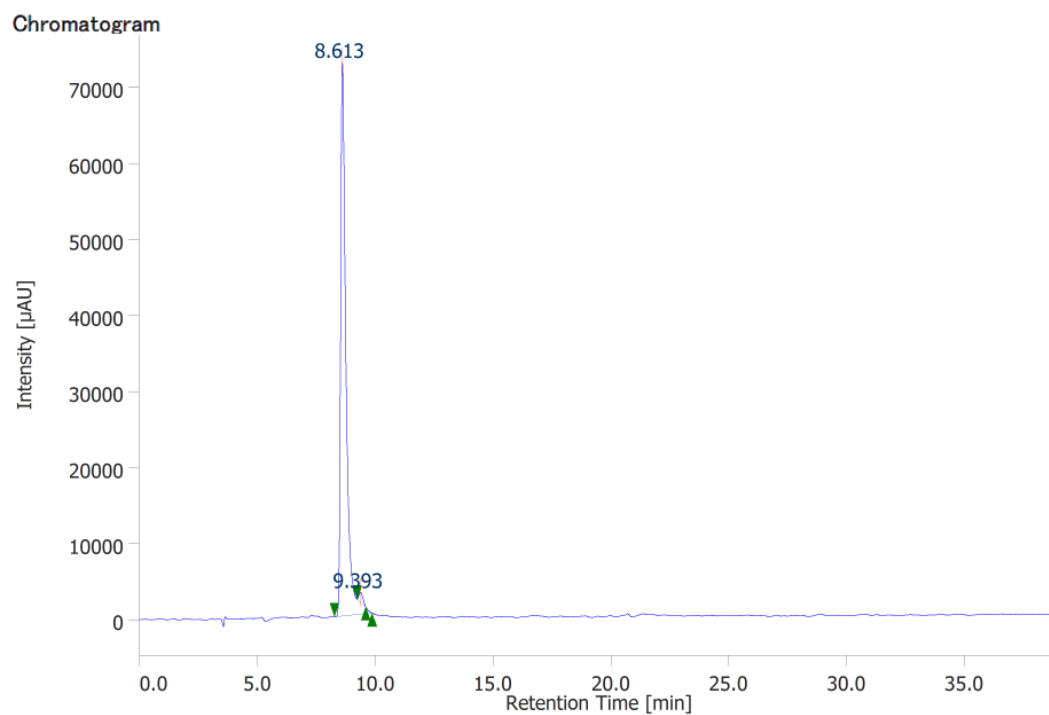

[(*S*)-4a and (*R*)-4a]

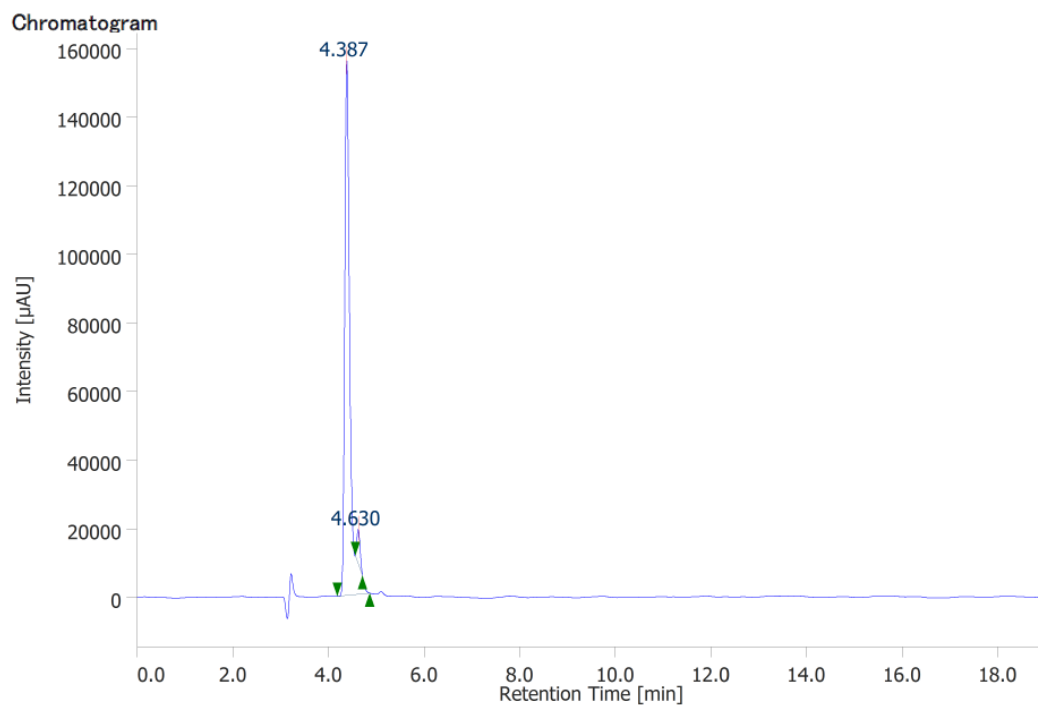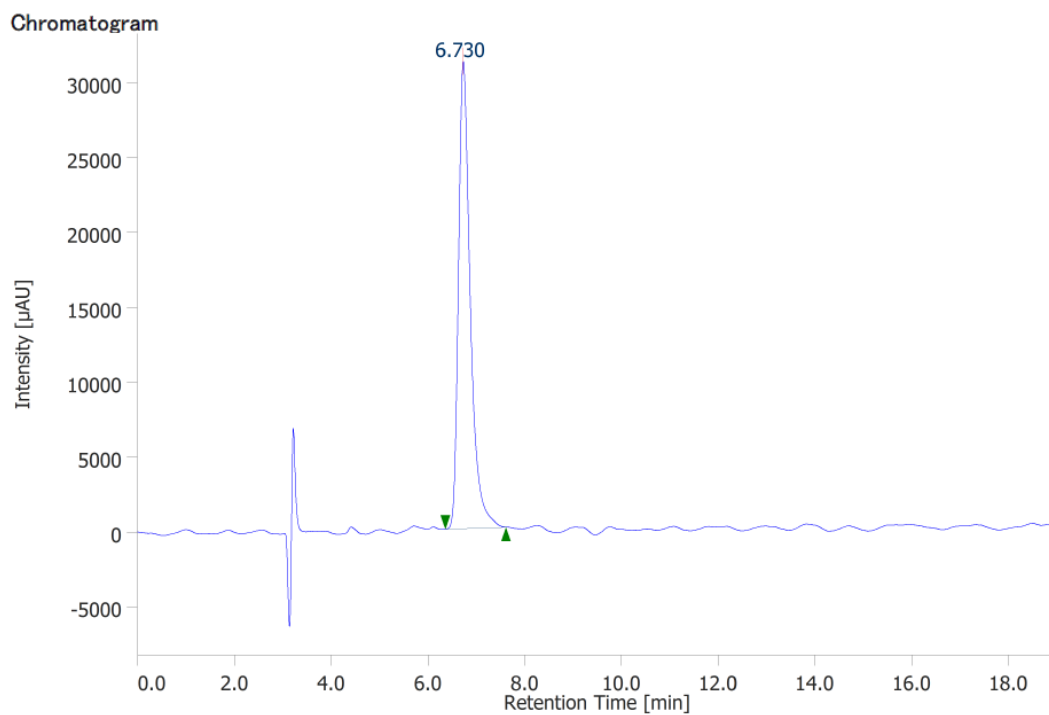

[(*S*)-**4b** and (*R*)-**4b**]

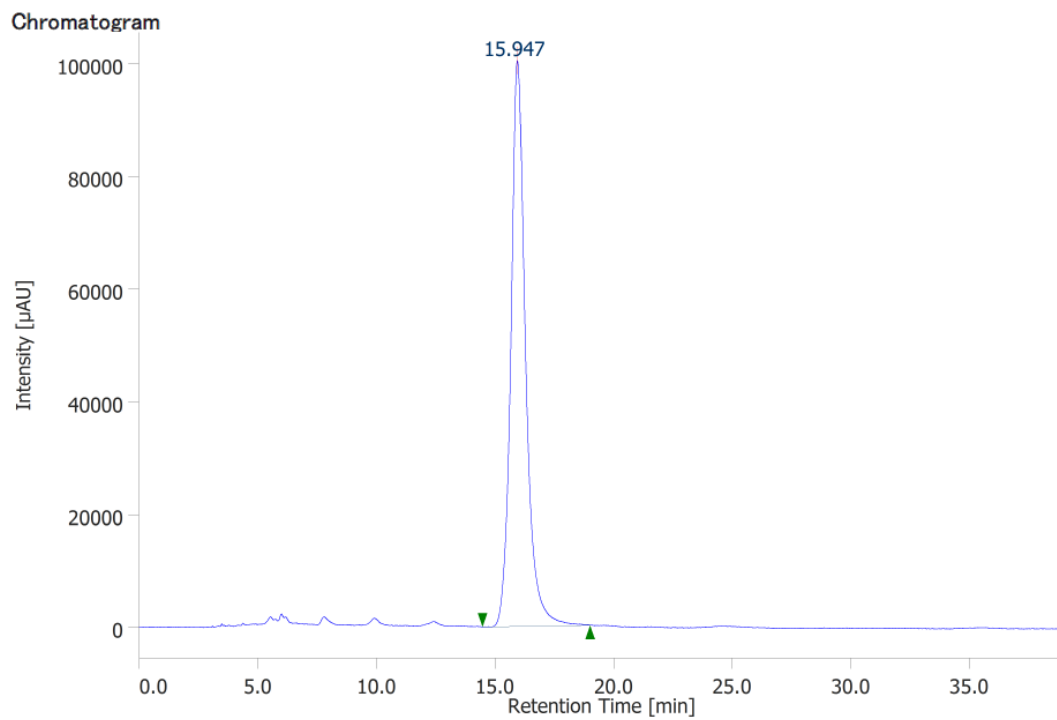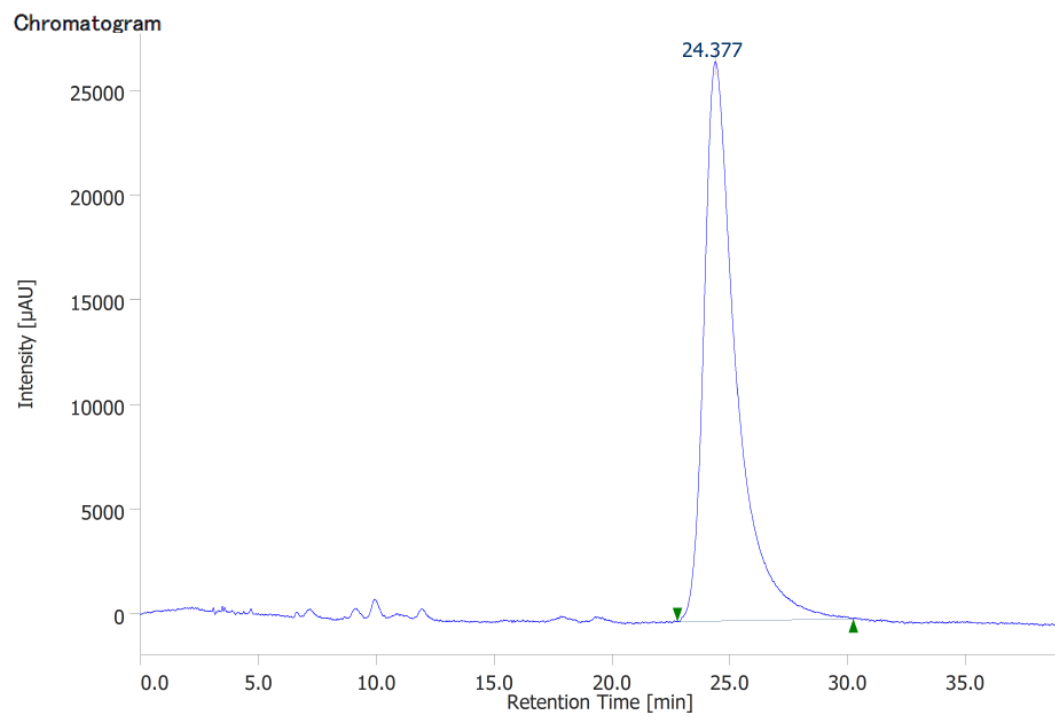

[(*S*)-**4c** and (*R*)-**4c**]

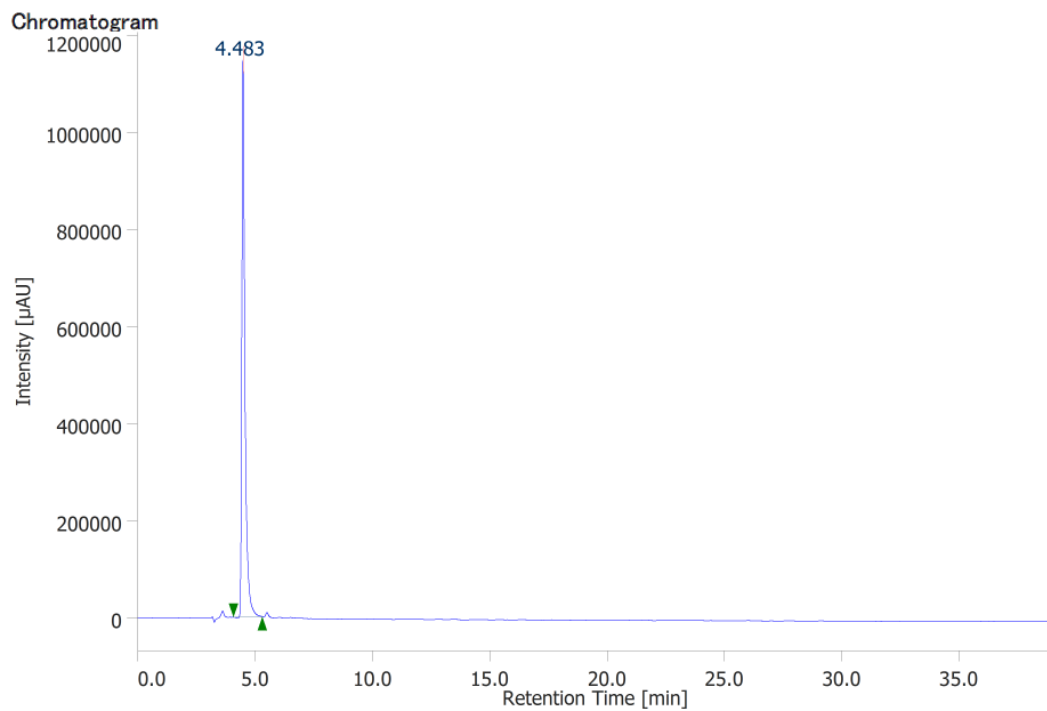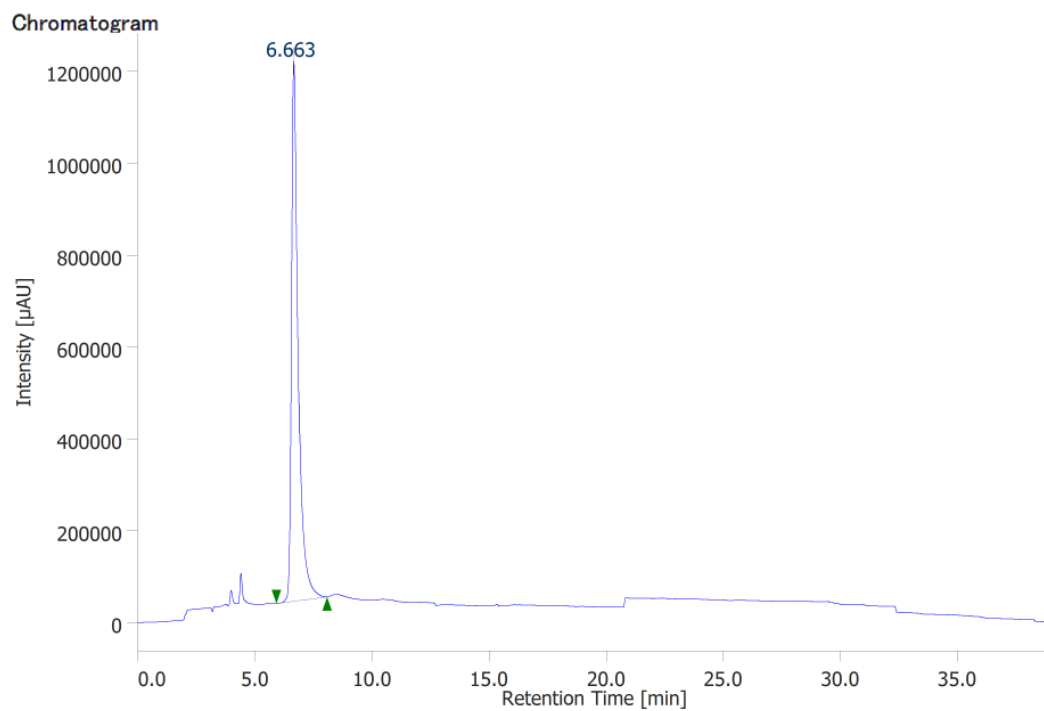

[(*S*)-5 and (*R*)-5]

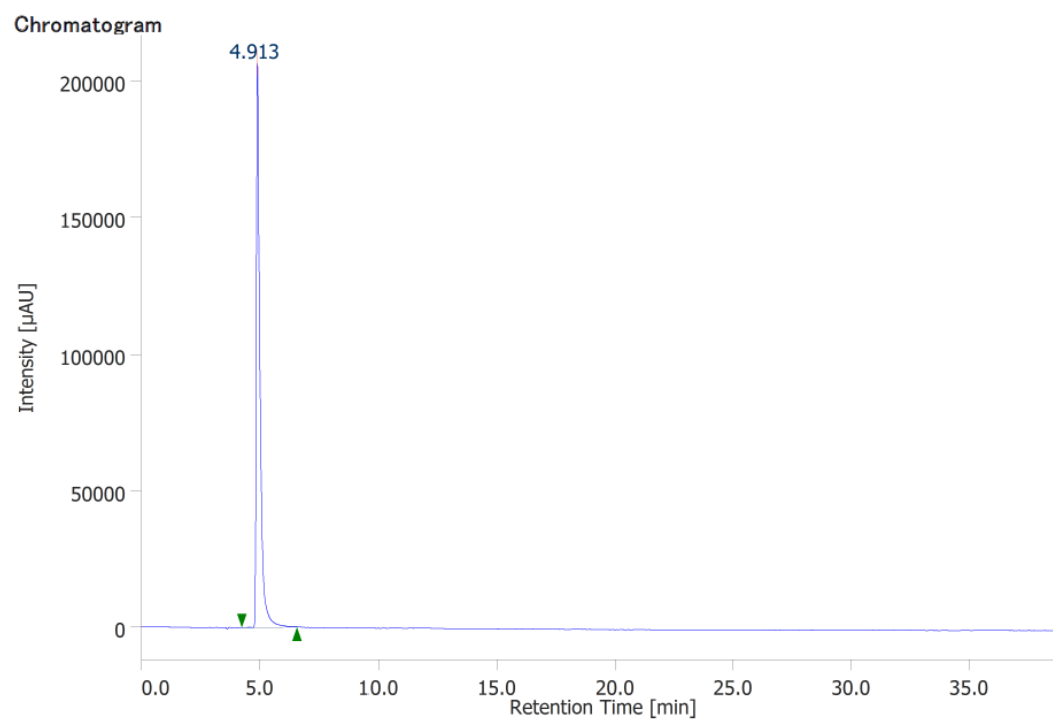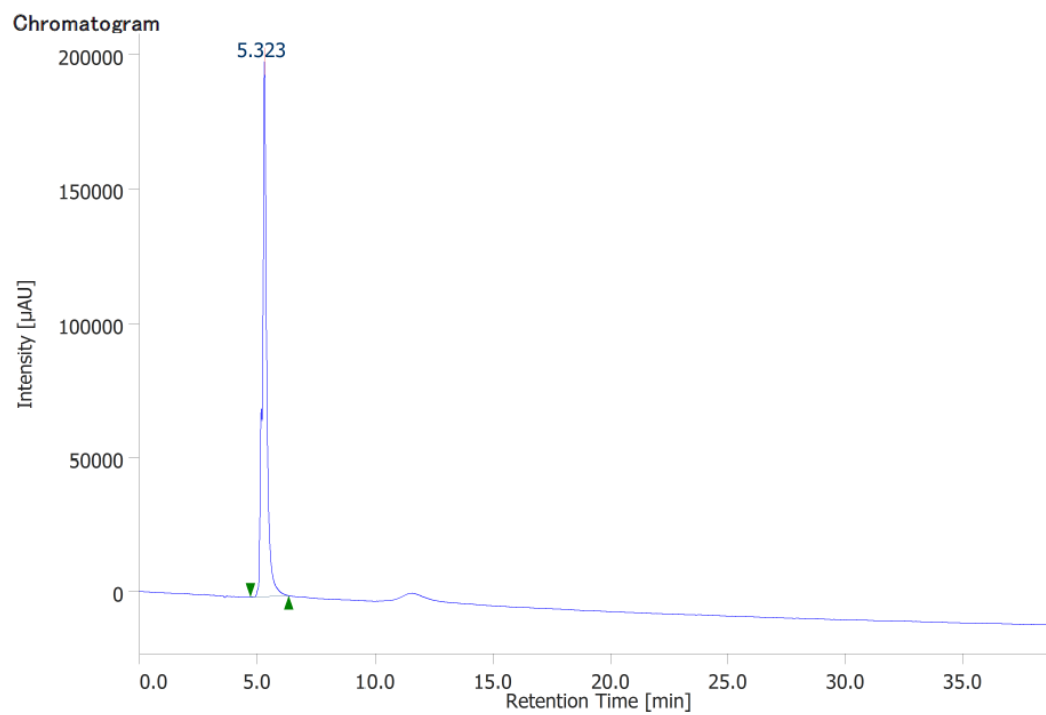

[(*S*)-6 and (*R*)-6]

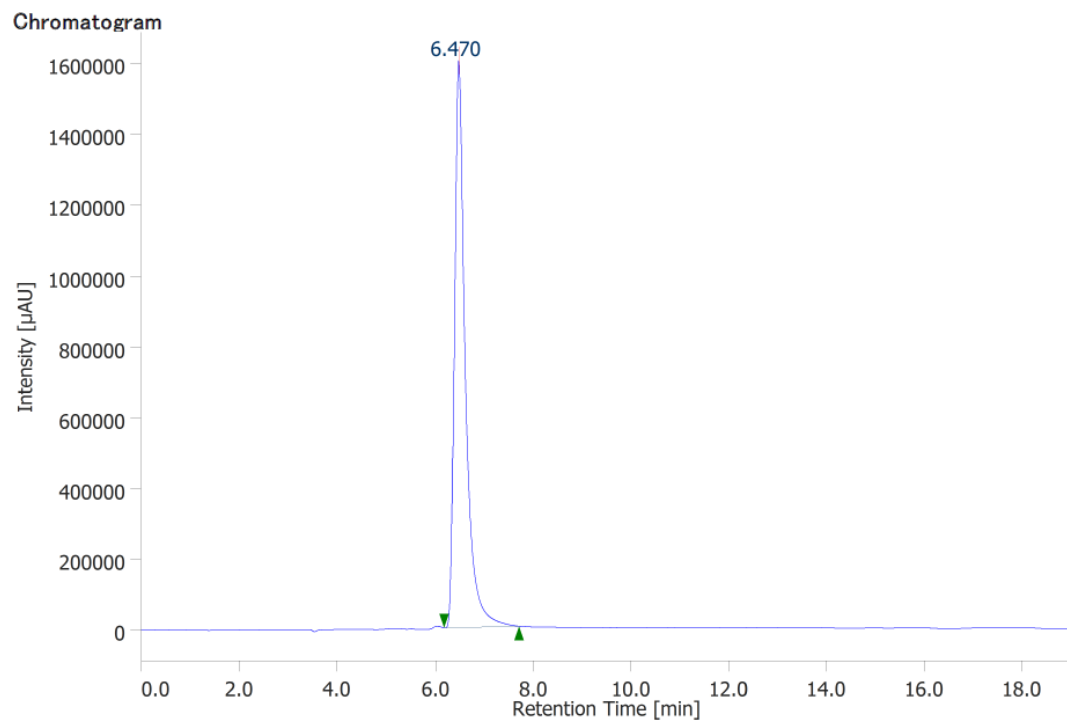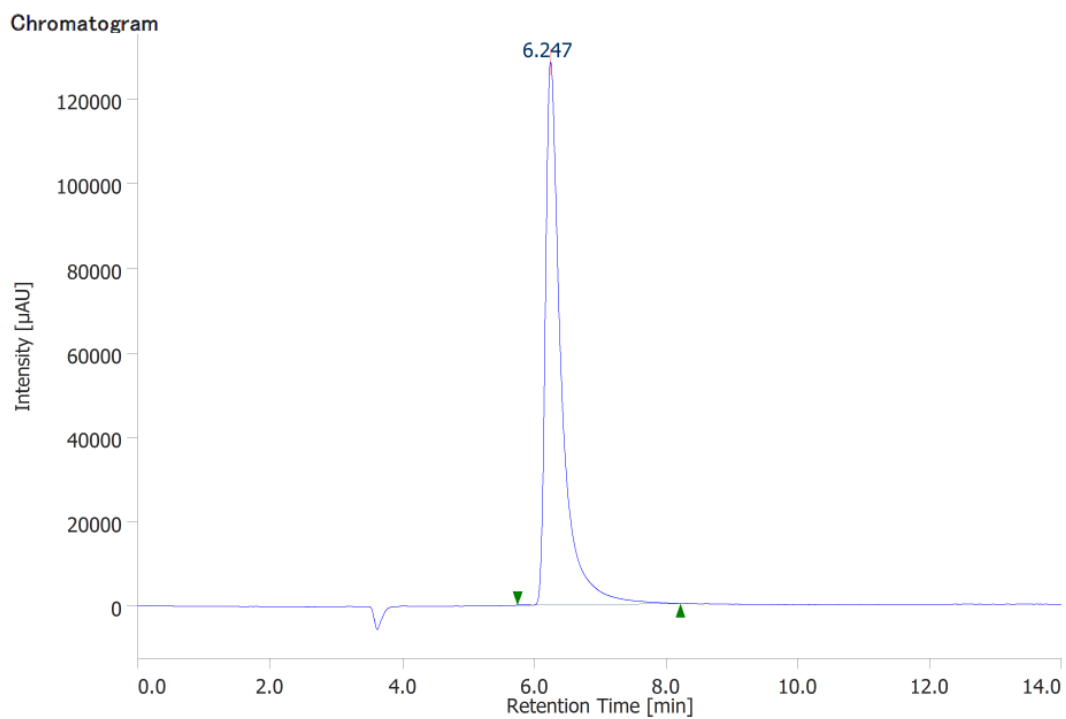



## 5. References

- <sup>1</sup> Sheldrick, G. M. *Acta Crystallogr. Sect. A*, **2008**, *64*, 112–122.  
<sup>2</sup> Farrugia, L. J. J. *Appl. Cryst.*, **2012**, *45*, 849–854.
